# Supplementary material for: Co-Aggregation and Parallel Aggregation of Specific Proteins in Major Mental Illness
Source: MDPI journal article supplement (doi:10.3390/cells12141848), 2023-07-13
Supplement: s1 [file s1]

## **Co-aggregation and parallel aggregation of specific proteins in major mental illness**

Bobana Samardžija\*, Maja Juković\*, Beti Zaharija, Éva Renner,

Miklós Palkovits & Nicholas J. Bradshaw

### **Supplementary information**

|              |                                                                                                  |
|--------------|--------------------------------------------------------------------------------------------------|
| Table S1:    | Sources and generation of plasmid vectors used in this study                                     |
| Table S2:    | Primers used for cloning in this study                                                           |
| Figure S1:   | Western blots of insoluble protein fractions, purified from human insular cortex samples         |
| Figure S2:   | Western blots of non-purified insular cortex sample homogenates                                  |
| Figure S3:   | Pairwise comparisons of insoluble protein levels in the insular cortex samples                   |
| Figure S4:   | Expression patterns of Flag-tagged proteins expressed with EGFP alone and of EGFP-fused proteins |
| Figure S5:   | Versions of experiments in figure 4H-K using reciprocal plasmid vectors                          |
| Figure S6:   | Versions of experiments in figure 5A-G using reciprocal plasmid vectors                          |
| Figure S7:   | Quantified data on CRMP1 and DISC1 co-aggregation                                                |
| Figure S8:   | Expression patterns of proteins in HEK293 match those in SH-SY5Y                                 |
| Figure S9:   | Western blots of additional TRIOBP-1 vectors                                                     |
| Appendix S1: | Amino acid of proteins expressed using plasmid vectors in this study                             |

| No. | Vector backbone  | Gene insert            | Origin                                                                                                                                                                   |
|-----|------------------|------------------------|--------------------------------------------------------------------------------------------------------------------------------------------------------------------------|
| 1   | pENTR1A no ccDB  | (None)                 | Campeau et al (2009) PLOS One 4:e6529 (Addgene, clone 17398)                                                                                                             |
| 2   | pdcdNA-FlagMyc   | (None)                 | BCCM/LMBP Plasmid Collection, clone LMBP 4705                                                                                                                            |
| 3   | pDEST-CMV-EGFP   | (None)                 | Agrotis et al (2019) Autophagy 15:976-997 (Addgene, clone 123215)                                                                                                        |
| 4   | pcDNA3.1         | CRMP1 Sv               | Bader et al. (2012) Hum. Mol. Genet. 21:4406-4418 (gift from Carsten Korth)                                                                                              |
| 5   | pcDNA3.1         | CRMP1 Lv               | Bader et al. (2012) Hum. Mol. Genet. 21:4406-4418 (gift from Carsten Korth)                                                                                              |
| 6   | pENTR1A          | CRMP1 Sv               | Subcloned from plasmid 4 in two rounds of PCR, with primers A & C, then D & E. Restriction digested and ligated into the <i>KpnI</i> and <i>XbaI</i> sites of plasmid 1. |
| 7   | pENTR1A          | CRMP1 Lv               | Subcloned from plasmid 5 in two rounds of PCR, with primers B & C, then D & E. Restriction digested and ligated into the <i>KpnI</i> and <i>XbaI</i> sites of plasmid 1. |
| 8   | pENTR223         | DISC1                  | DNASU Plasmid Repository, clone HsCD00516321                                                                                                                             |
| 9   | pENTR223.1       | NPAS3                  | DNASU Plasmid Repository, clone HsCD00080332                                                                                                                             |
| 10  | pENTR1A          | TRIOBP-1               | Bradshaw et al (2017) J. Biol. Chem. 292:9583-9598 (gift from Carsten Korth)                                                                                             |
| 11  | pdcdNA-Flag      | CRMP1 Sv               | LR clonase recombination of plasmids 2 and 6                                                                                                                             |
| 12  | pdcdNA-Flag      | CRMP1 Lv               | LR clonase recombination of plasmids 2 and 7                                                                                                                             |
| 13  | pdcdNA-Flag      | DISC1                  | LR clonase recombination of plasmids 2 and 8                                                                                                                             |
| 14  | pdcdNA-Flag      | NPAS3                  | Samardžija et al (2021) J. Pers. Med. 11:1070                                                                                                                            |
| 15  | pdcdNA-Flag      | TRIOBP-1               | Bradshaw et al (2017) J. Biol. Chem. 292:9583-9598 (gift from Carsten Korth)                                                                                             |
| 16  | pdcdNA-Flag      | TRIOBP-1 Δ1-59Δ333-340 | Zaharija et al (2022) Int. J. Mol. Sci. 23:11048                                                                                                                         |
| 17  | pdcdNA-Flag      | TRIOBP-1 1-280         | Bradshaw et al (2017) J. Biol. Chem. 292:9583-9598 (gift from Carsten Korth)                                                                                             |
| 18  | pdcdNA-Flag      | TRIOBP-1 281-555       | Bradshaw et al (2017) J. Biol. Chem. 292:9583-9598 (gift from Carsten Korth)                                                                                             |
| 19  | pdcdNA-Flag      | TRIOBP-1 556-652       | Bradshaw et al (2017) J. Biol. Chem. 292:9583-9598 (gift from Carsten Korth)                                                                                             |
| 20  | pDEST-CMV-N-EGFP | (Empty control)        | LR clonase recombination of plasmids 1 and 4                                                                                                                             |
| 21  | pDEST-CMV-N-EGFP | CRMP1 Sv               | LR clonase recombination of plasmids 4 and 6                                                                                                                             |
| 22  | pDEST-CMV-N-EGFP | CRMP1 Lv               | LR clonase recombination of plasmids 4 and 7                                                                                                                             |
| 23  | pDEST-CMV-N-EGFP | DISC1                  | LR clonase recombination of plasmids 4 and 8                                                                                                                             |
| 24  | pDEST-CMV-N-EGFP | NPAS3                  | LR clonase recombination of plasmids 4 and 9                                                                                                                             |
| 25  | pDEST-CMV-N-EGFP | TRIOBP-1               | LR clonase recombination of plasmids 4 and 10                                                                                                                            |

**Table S1.** Sources and generation of plasmid vectors used in this study. See table S2 for references to primers.

| Label | Name             | Primer                         |
|-------|------------------|--------------------------------|
| A     | CRMP1-1sv-salF   | GAAGTCGACATGTCGTACCAG          |
| B     | CRMP1-1lv-salF   | GTAAGTCGACATGGCGGACCG          |
| C     | CRMP1-572sv-ecoR | GTAGAATTCTCATCAACCGAGGCTG      |
| D     | Extension F      | GCTATAAGGATCCGGTACCTAGTCGACATG |
| E     | Extension R      | GGCACCAGCTCGAGTCTAGAATTCTCATC  |

**Table S2.** Primers used for cloning in this study. “Label” corresponds to how they are referred to in table S1.

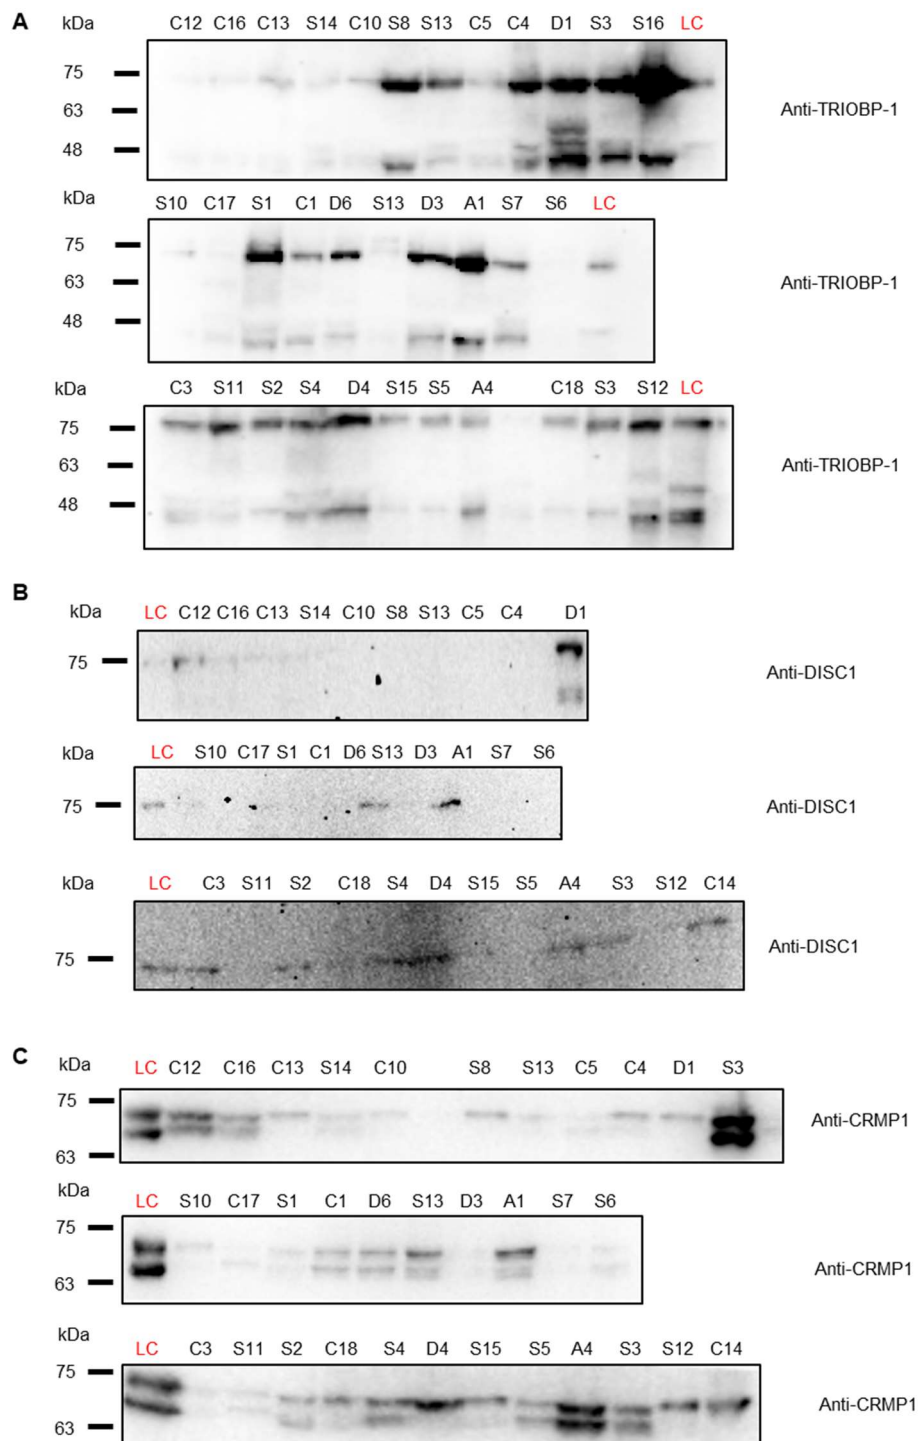

**Figure S1.** Western blots of the insoluble protein fractions, purified from insular cortex samples. Samples are labelled with diagnostic status (S: victim of suicide, C: control individual, D: major depressive disorder patient, A: Alzheimer's disease patient) and a unique number to allow comparison between blots in figures S1 and S2, which displays the corresponding non-purified homogenates. LC is a loading control: a standard sample loaded on all membranes to allow normalisation of signal quantification between gels.

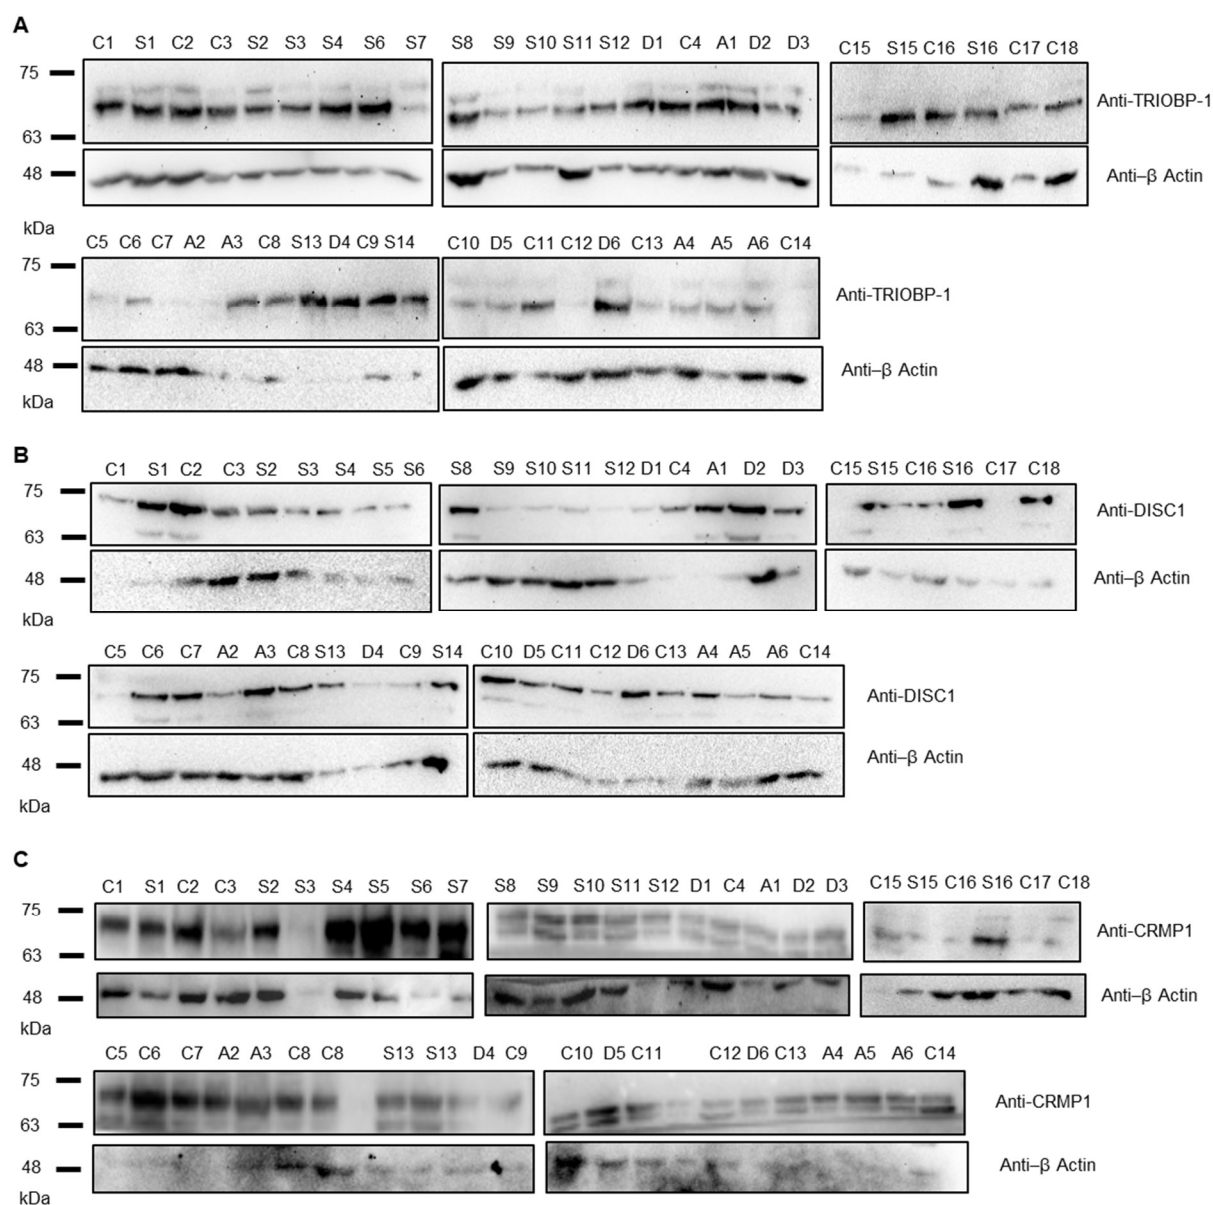

**Figure S2.** Western blots of insular cortex sample homogenates. Samples are labelled with diagnostic status (S: victim of suicide, C: control individual, D: major depressive disorder patient, A: Alzheimer's disease patient) and a unique number to allow comparison between blots in figures S1 and S2, which displays insoluble protein fractions, purified from these homogenates.

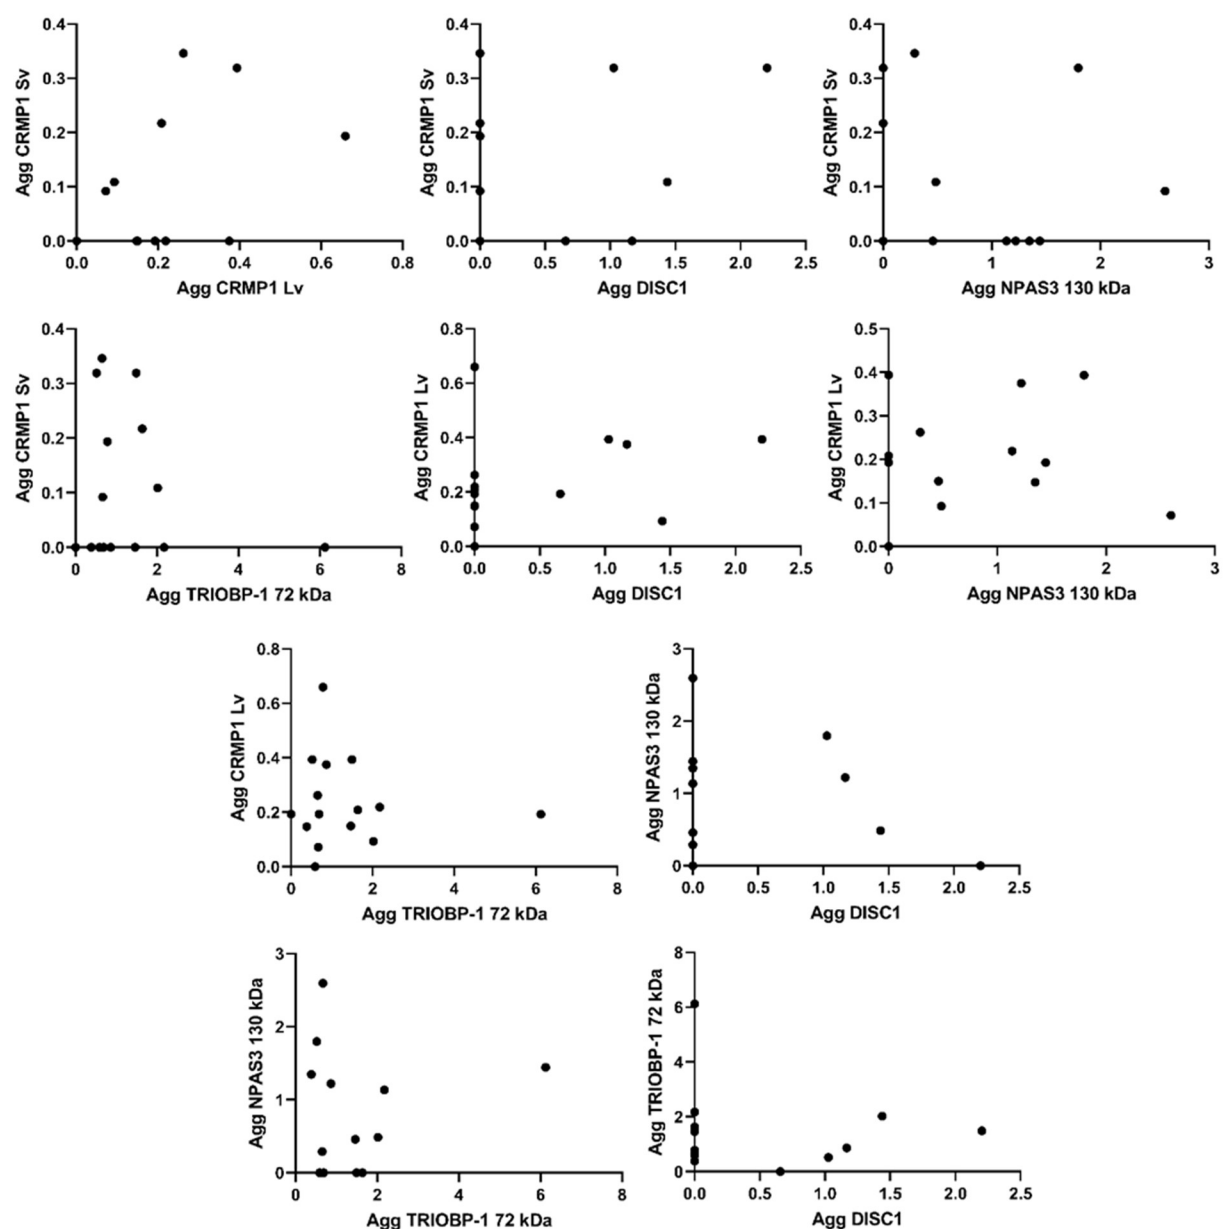

**Figure S3.** Comparison of levels of CRMP1 sv, CRMP1 lv, DISC1 (75kDa), NPAS3 (130kDa) and TRIOBP-1 in individuals. Based on data shown in figures 2 and S1.

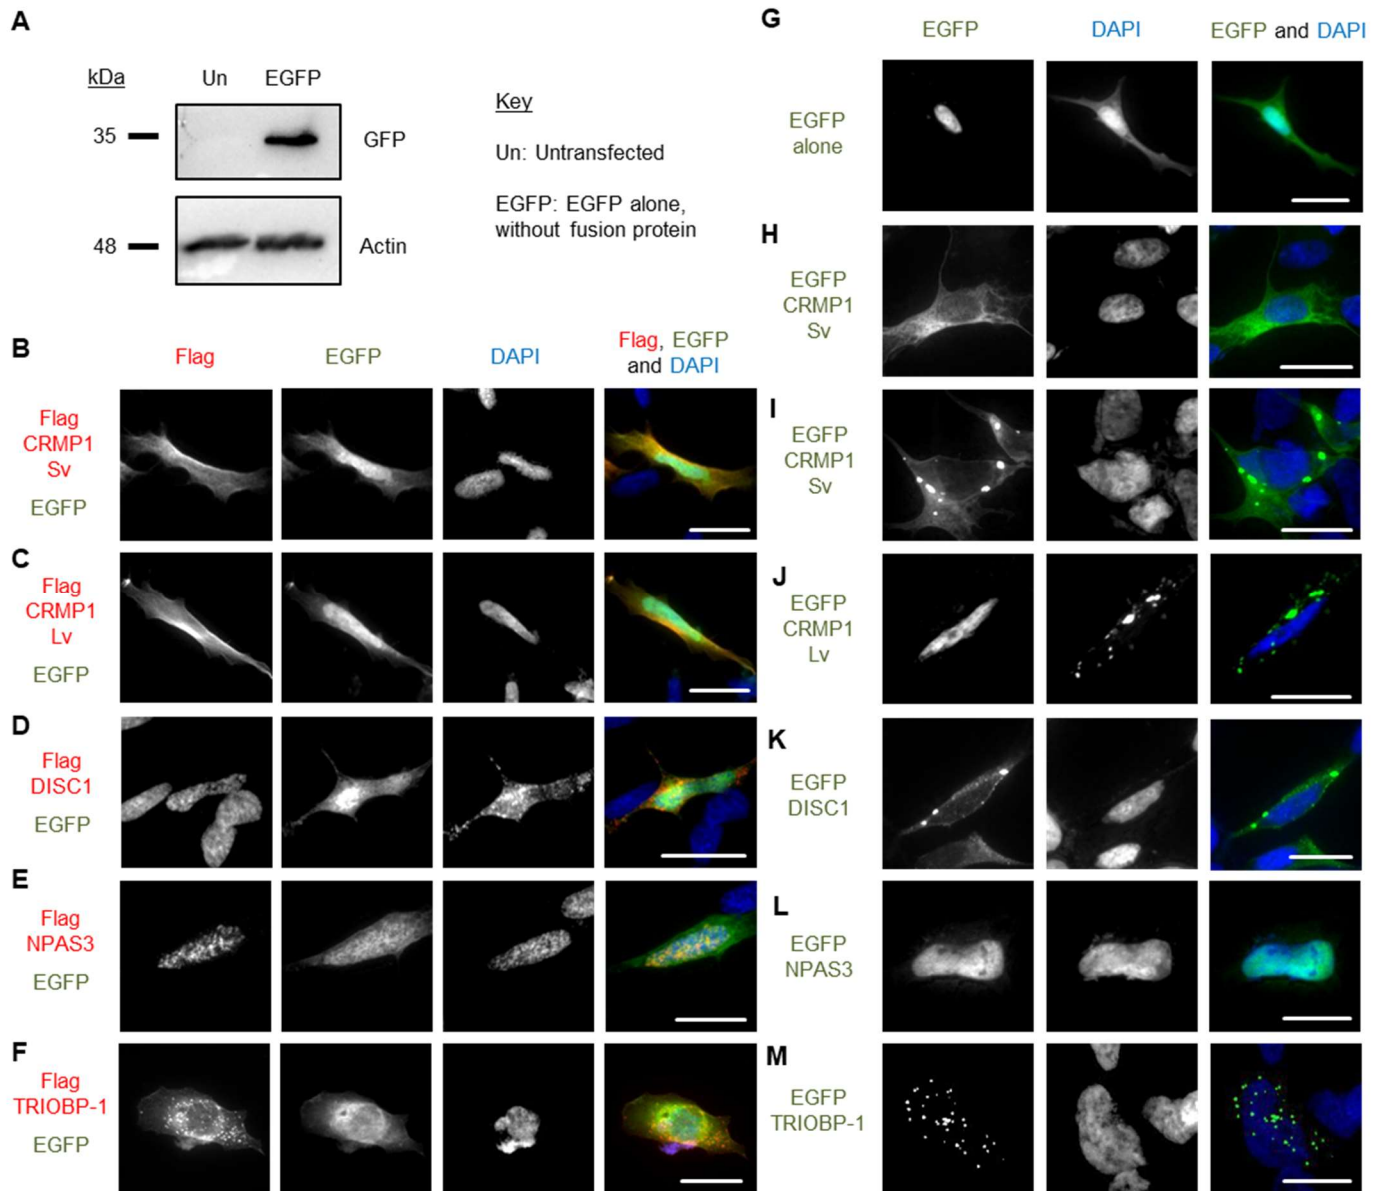

**Figure S4.** Expression of plasmids, in SH-SY5Y cells unless otherwise stated. **(A)** Western blot, showing expression of a construct encoding EGFP alone, with no fusion protein, in HEK293 cells. **(B-F)** Expression of Flag-tagged proteins (the same vectors as in figure 4C-G of the main text) together with EGFP alone: CRMP1 Sv (B), CRMP1 Lv (C), DISC1 (D), NPAS3 (E) and TRIOBP-1 (F). There are no obvious effects on expression patterns of the Flag tagged proteins. **(G)** Expression of EGFP alone. **(H-M)** Expression of EGFP-fused proteins, CRMP1 Sv with no aggregation (H, as seen in most cells), CRMP1 Sv with aggregation (I, minority of cells), CRMP1 Lv (J), DISC1 (K), NPAS3 (L) and TRIOBP-1 (M). Except for some EGFP-CRMP1 Sv & Lv cells showing aggregation (I, J), all constructs showed similar expression patterns to their Flag-tagged counterparts. All images are typical of three independent experiments. Scale bars represent 10  $\mu$ m.

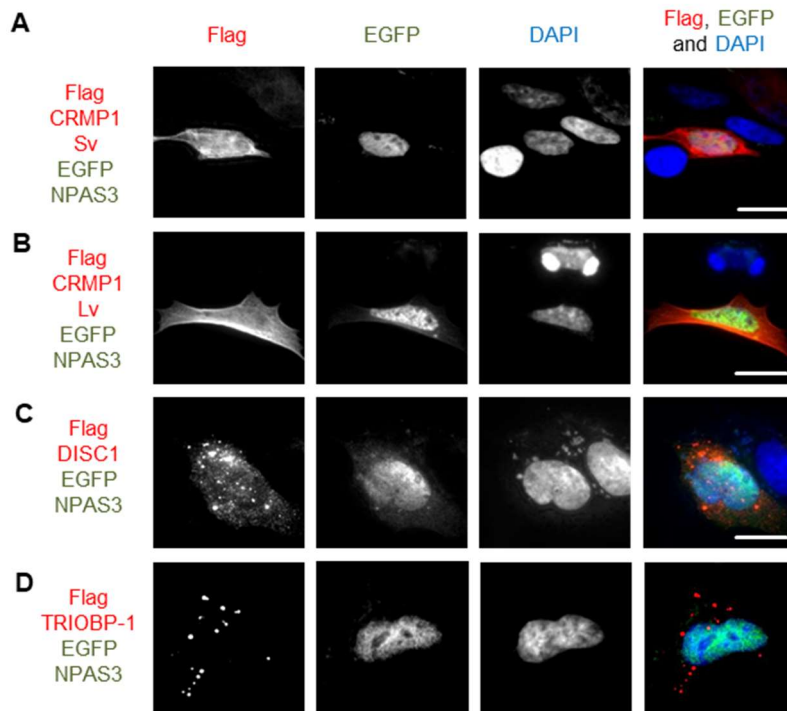

**Figure S5.** Expression of plasmids in SH-SY5Y cells, in experiments using reciprocal plasmid vectors from those in the main text. **(A)** Flag-tagged CRMP1 Sv and EGFP-fused NPAS3, neither aggregating, reciprocal experiment to that in figure 4H. **(B)** Flag-tagged CRMP1 Lv and EGFP-fused NPAS3, neither aggregating, reciprocal experiment to that in figure 4I. **(C)** Flag-tagged DISC1 and EGFP-fused NPAS3, only DISC1 is aggregating, reciprocal experiment to that in figure 4J. **(D)** Flag-tagged TRIOBP-1 and EGFP-fused NPAS3, only TRIOBP-1 is aggregating, reciprocal experiment to that in figure 4K. All images are typical of three independent experiments. Scale bars represent 10  $\mu$ m.



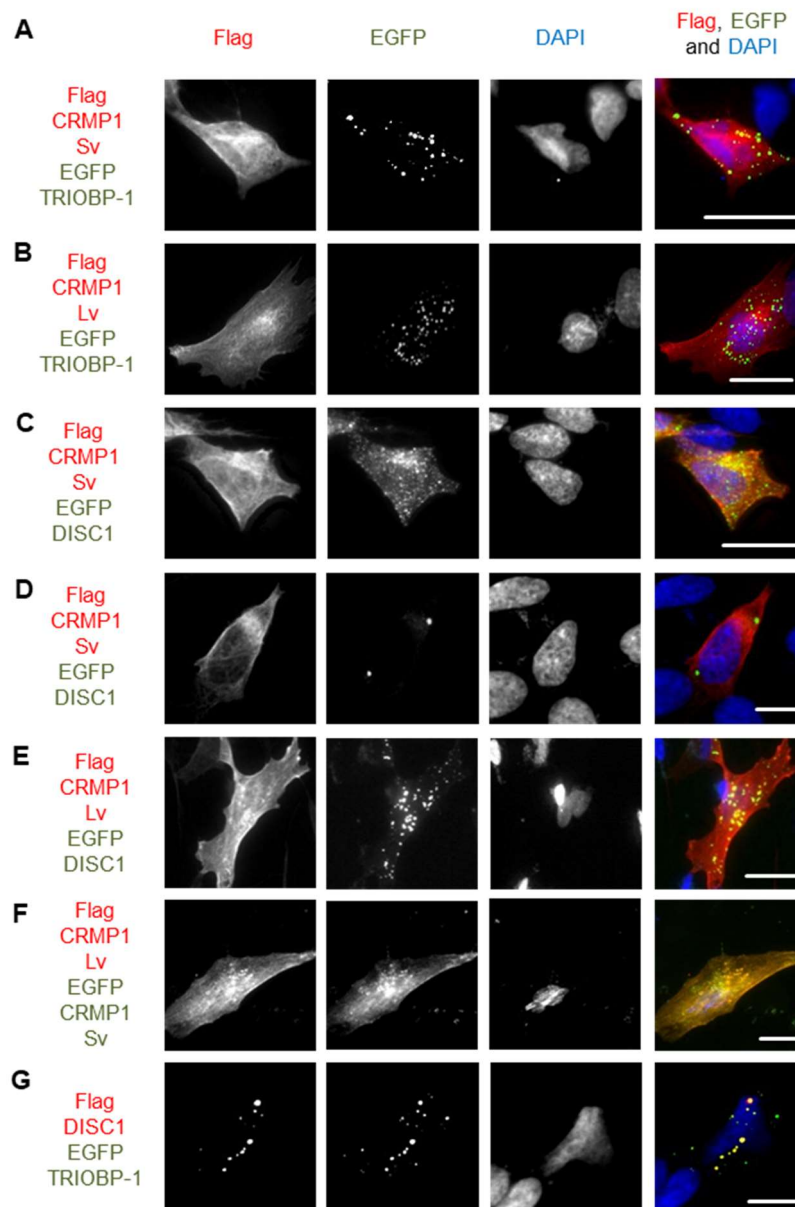

**Figure S6.** Expression of plasmids in SH-SY5Y cells, in experiments using reciprocal plasmid vectors from those in the main text. **(A)** Flag-tagged CRMP-1 Sv and EGFP-fused TRIOBP-1, only TRIOBP-1 aggregates, reciprocal experiment to that in figure 5A. **(B)** Flag-tagged CRMP-1 Lv and EGFP-fused TRIOBP-1, only TRIOBP-1 aggregates, reciprocal experiment to that in figure 5B. **(C-D)** Flag-tagged CRMP-1 Sv and EGFP-fused DISC1, example of cell with co-aggregation (C) and DISC1 aggregation only (D), reciprocal experiment to that in figure 5C. **(E)** Flag-tagged CRMP-1 Lv and EGFP-fused DISC1 with some co-aggregation, reciprocal experiment to that in figure 5D. **(F)** Flag-tagged CRMP1 Lv and EGFP-fused CRMP1 Sv, with co-aggregation seen, reciprocal experiment to that in figure 5E. **(G)** Flag-tagged DISC1 and EGFP-fused TRIOBP-1, with extensive co-aggregation seen, reciprocal experiment to that in figure 5F. All images are typical of three independent experiments. Scale bars represent 10  $\mu\text{m}$ .

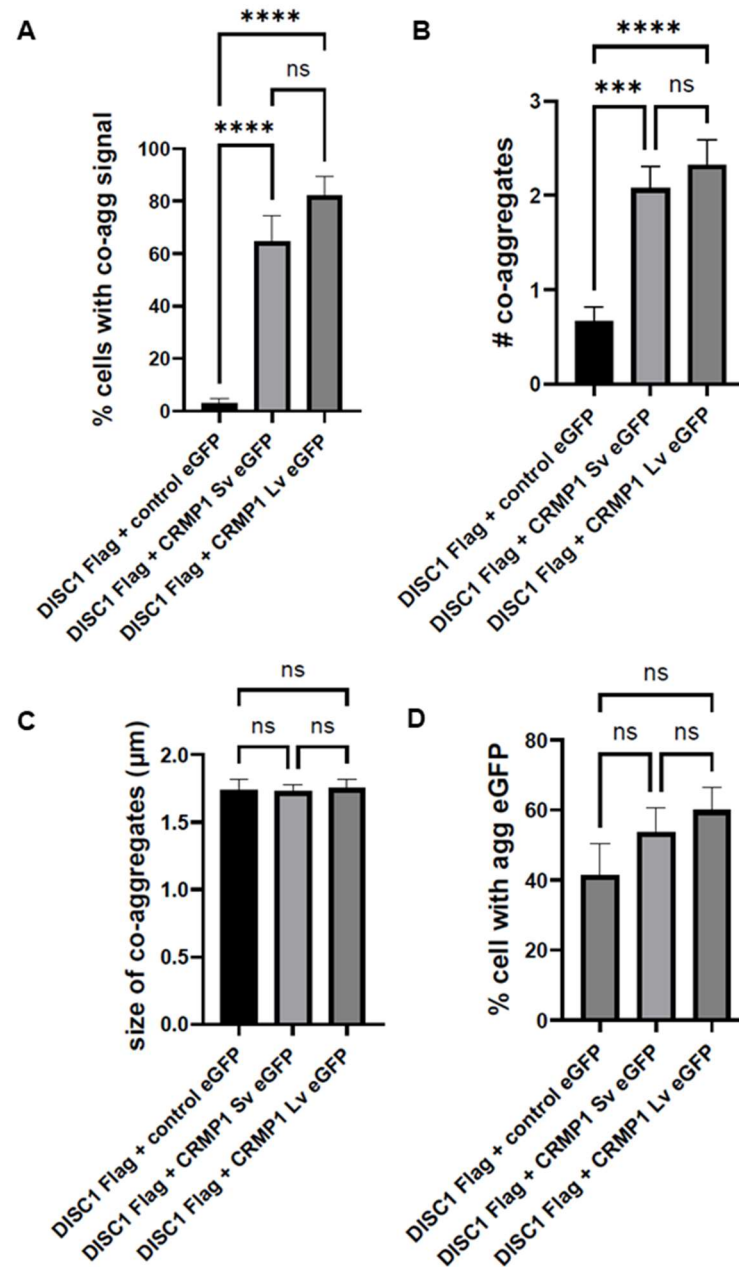

**Figure S7.** Additional quantification of DISC1 and CRMP1 aggregation in a co-aggregation blinded immunofluorescent microscopy assay (see figure 6). SH-SY5Y cells were transfected with Flag-DISC1 and one of EGFP, EGFP-CRMP1 Sv or EGFP-CRMP1 Lv. Results are an average of 10 coverslips per plasmid combination (9 in the case of DISC1 + EGFP), with 10 transfected cells examined per coverslip (or as many transfected cells as could be found). **(A)** Mean percentage of successfully transfected cells in which co-aggregation of Flag and EGFP seem to occur, defined as co-localisation at a punctate structure at least 1 μm in diameter. **(B)** Number of distinct co-aggregates in such cells. **(C)** Mean size of co-aggregates in such cells. **(D)** Percentage of successfully transfected cells in which aggregates of EGFP were seen (regardless of DISC1 aggregation status). All statistics are one-way ANOVA: \*\*\*\*:  $p < 0.0001$ , \*\*\*:  $p < 0.001$ , ns: not significant.

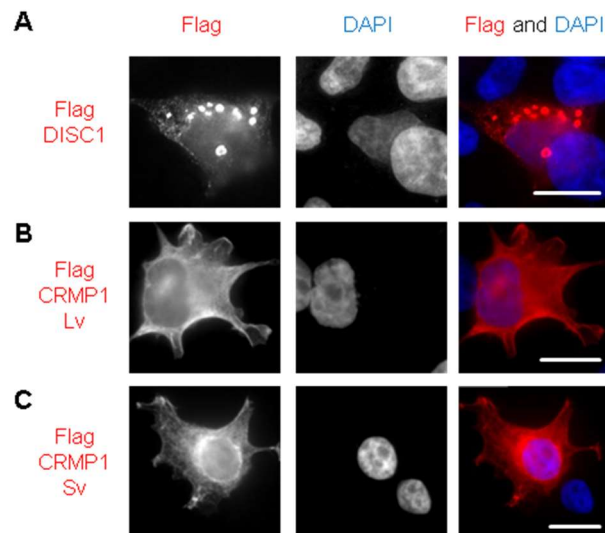

**Figure S8.** Expression patterns of Flag-tagged proteins expressed in HEK293 closely matches the patterns seen when the same proteins are expressed in SH-SY5Y (as shown in figure 4). **(A)** DISC1. **(B)** CRMP-1 Lv. **(C)** CRMP-1 Sv. Scale bars represent 10 μm.

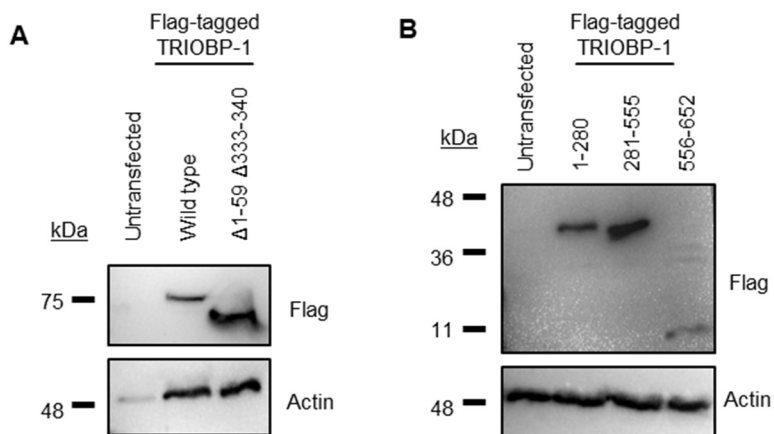

**Figure S9.** Western blots of HEK293 cells expressing the TRIOBP-1 constructs. **(A)** Expression of wild type (full length) TRIOBP-1 compared to a mutant version with two deletions, as used in figures 6B-C. **(B)** Expression of individual domains of TRIOBP-1, as used in figures 6D-I.

## **Appendix S1 - Amino acid of proteins expressed using plasmid vectors in this study**

Amino acid sequences of proteins expressed from plasmid vectors in this study, as confirmed by sequencing. Numbers in brackets refer to table S1.

In all instances, amino acids listed in **blue** indicate the endogenous protein sequence, amino acids in **red** indicate Flag or c-Myc tags, amino acids in **green** indicate an EGFP fusion protein, and amino acids in black indicate other non-endogenous residues added in the cloning process.

### **(11) pdcDNA-Flag-CRMP1 Sv**

MDYKDDDDKAAITSLYKKAGFKGTNSVDM**SYQGKKSIPHITSDRLLIKGGRI**INDDQSLYADVYLEDGLIKQIGE  
NLIVPGGVKTI**EANGRMVIPGGIDVNTYLQKPSQGM**TAADDF**FQGT**RAALVGGTTMIIDHV**VPEPGSSLLTSFEK**  
WHEAADTKSCCDYSLHVDITSWYDGVREELEV**LVQDKGVNSFQVY**MAYKD**VYQMSDSQ**LYEAFTFLKGLGAVILV  
HAENGDLIAQE**QKRILEMGITGPEGH**ALSRPEELEAEAVFRAIT**IAGRINCPVYITKVMSKSAADI**IALARKKG**P**  
LVFG**EPIAAS**LGTDGTHYWSKNWAKAAAFVTS**PPLSPDPTT**PDYLT**SLLACGDLQVTGSGHCPYSTAQKAVGKDN**  
FTLI**PEGVNGIEERMTVVWDKAVATGKMDENQFVAVTSTNAAKIFNLYPRKGRI**AVGSDADV**VIWDPDKLKTITA**  
KSHK**SAVEYNI**FEGMECHGS**PLVVISQ**GKIVFEDGNINVNKG**MGRFIPRKA**FP**EHLYQ**RVKIRNKV**FGLQGVSRG**  
MYDGPVY**EV**PATPKYATPAPS**AKSSPSKHQPPP**IRNLHQS**NFSLSGAQID**DN**NP**RR**TG**HRIVAPP**GGRSNITSLG**  
\*

### **(12) pdcDNA-Flag-CRMP1 Lv**

MDYKDDDDKAAITSLYKKAGFKGTNSVDM**ADRRRAWNT**EDDL**PVYLARPGSAAQ**TPRQKYGGMF**AAVEGAYENKT**  
IDFDAYS**VGR**RSARTPR**SAGRPDAVGLPGPGG**SEDTASDVSEPSGSAVSS**PGERDERPPTLRIRRPAPRDLPLG**  
RDNGQSD**RLLIKGGRI**INDDQSLYADVYLEDGLIKQIGENLIVPGGVKTI**EANGRMVIPGGIDVNTYLQKPSQGM**  
TAADDF**FQGT**RAALVGGTTMIIDHV**VPEPGSSLLTSFEK**WHEAADTKSCCDYSLHVDITSWYDGVREELEV**LVQD**  
KGVNS**FQVY**MAYKD**VYQMSDSQ**LYEAFTFLKGLGAVILVHAENGDLIAQE**QKRILEMGITGPEGH**ALSRPEELEA  
EAVFRAIT**IAGRINCPVYITKVMSKSAADI**IALARKKG**P**LVFG**EPIAAS**LGTDGTHYWSKNWAKAAAFVTS**PPLS**  
PDPTT**PDYLT**SLLACGDLQVTGSGHCPYSTAQKAVGKDNFTLI**PEGVNGIEERMTVVWDKAVATGKMDENQFVAV**  
TSTNAAKIFNLYPRKGRIAVGSDADV**VIWDPDKLKTITAKSHKSAVEYNI**FEGMECHGS**PLVVISQ**GKIVFEDGN  
INVNKG**MGRFIPRKA**FP**EHLYQ**RVKIRNKV**FGLQGVSRG**MYDGPVY**EV**PATPKYATPAPS**AKSSPSKHQPPP**IRN  
LHQS**NFSLSGAQID**DN**NP**RR**TG**HRIVAPP**GGRSNITSLG**\*

### **(13) pdcDNA-Flag-DISC1**

MDYKDDDDKAAITSLYKKAGFKGTNSVDM**PGGGPQ**GAPAAAGGGGVSHRAGSRDCL**P**PAACFRRRRLARRPGYMR  
SSTG**P**GIGFLSPAVGTLFR**F**PGGVSGEESHSESRARQCGLDSRGLLVRS**P**VSKSAAAPT**V**TSVRG**TSAHF**GIQL  
RGGTRL**P**DRLSWPCG**P**GSAGWQ**Q**EFAAMDSSETLDASWEAACSDGARRVRAAGSL**P**SAELSSNSC**S**PGCGPEVPP  
TPPGSHSAFTSSFS**F**IRLSLGSAGERGEAEGCPPS**R**EAE**SHCQSPQ**EMGAKAASLDGPHEDPRCL**SQ**PF**S**LLATR  
VSADLAQAARNSSRPERDMHSLPDMDPGSSSLDPSLAGCGGDGSSGSDAHSWD**TLLRKWEPVLRDCLLRNRRQ**  
MEVISLRLKLQKLQEDAVENDDYDKAETLQQRLEDLEQEKISLHFQLPSRQPALSS**F**LGHAAQVQAALRRGATQ  
QASGDDTHTPLRMEPRLLEPTAQDSLHVSITRRDWLLQEKQQLQKEIEALQARMFVLEAKDQQLRREIEEQEQQL  
QWQCGDLT**PLVGQ**LSLQ**LQ**EVSKALQDTLASAGQIP**F**HAEP**PETIRSLQ**ERIKSLNLSLKEITTKVCMSEK**FCS**  
TLRKKVNDIETQLPALLEAKMHAI**S**GNHFWTAKDLTEEIRSLT**S**EREGLEGLLSKLLVLSSRN**V**KKLG**SVKEDYN**  
RLRREVEHQETAYETSVKENTMKYMETLKNKLC**SC**KCP**LLGKV**WEADLEACRL**L**IQSLQ**LQ**EA**RGSLSV**EDER**QM**  
DDLEGAAPP**IP**PR**LH**SEDKRKT**PL**KESYILSAELGEKCEDI**G**KKLLYLE**DQLHTAIHSH**DEDL**LIQSLRRELQ**MQV**K**  
ETLQAMILQ**LQ**PAKEAGEREA**AA**SCMTAGVHEAQAYPTFLYKV**VIEQKLISEEDLN**\*

**(14) pdcDNA-Flag-NPAS3**

MDYKDDDDKAAITSLYKKVGMAPT KPSFQQDPSRRERLQALRKEKSRDAARSRRGKENFEFFYELAKLLPLPAAIT  
SOLDKASIIIRLTISYLKMRDFANQGDPPWNLRMEGPPPNTSVKGIQMWKSELCMRKTPCEVIGAQRRRSPSALAI  
EVFEAHLGSHILQSLDGFVFALNQEGKFLYISETVSIYLGLSQVELTGSSVFDYVHPGDHVEMAEQLGMKLPPGR  
GLLSQGTAE DGASSASSSSQSETPEPVESTSPSLTTDNTLERSFFIRMKSTLT KRGVHIKSSGYKVIHITGRLR  
LRVSLSHGRTVPSQIMGLVVVAHALPPPTINEVRIDCHMFVTRVNMDLNIIYCENRISDYMDLTPVDIVGKRCYH  
FIHAEDVEGIRHSHLDLLNKGQCVTKYRWMQKNGGYIWIQSSATIAINAKNANEKNI IWVNYLLSNPEYKDTPM  
DIAQLPHLPEKTSESSETSDES DSKDTSGITEDNENSKSDEKGNQSENSEDPEDRKKSGNACDNMNCNDDGH  
SSSNPDSRDSDDSFHSDFDENPKAGEDGFGALGAMQIKVERYVESESDLRLQNCESLTSDSAKSDSAGEAGAQA  
SSKHQKRKKRRKRQKGG SASRRRLSSASSPGGLDAGLVEPPRLLSPPNSASVLKIKTEISEPINFDNDSSIWNYP  
PNREISRNESPYSMTKPPSSEHFSPSPQGGGGGGGGGGGLHVAIPDSVLTTPPGADGAAARKTQFGASATAALAPVA  
SDPLSPPLSASPRDKHPGNGGGGGGGGGGAGGGGPSASNSLLYTGDLEALQRLQAGNVVLPVHRVTGT LAATST  
AAQRVYTTGTIRYAPAEVTLAMQSNLLPNAHAVNFVDVNSPGFGLDPKTPMEMLYHHVHRLNMSGPFGGAVSAAS  
LTQMPAGNVFTTAEGLFSTLPFPVYSNGIHAAQTLERKEDYPTFLYKVVIEQKLISEEDLN\*

**(15) pdcDNA-Flag-TRIOBP-1 (wild type)**

MDYKDDDDKAAITSLYKKAGFKGTNSVDMGGWKGPQGRRGKEGPEARRRAAERGGGGGGGGVPAPRSPAREPRPR  
SCLLLPPPWGAAMTPDLLNFKKGWMSILDEPGEPPSPSLTTTSTSQWKKHWFVLTDS SLKYRDS TAE EADELDG  
EIDLRSDTDVTEYAVQRNYGFQIHTKDAVYTLSAMTSGIRRNWIEALRKTVRPTSAPDVTKLSDSNKENALHSYS  
TQKGPLKAGEQRAGSEVISRGGPRKADGQRQALDYVELSPLTQAS PQARTPARTPDR LAKQEELERDLAQRSEE  
RKNWFEATDSRTPEVPAGEGPRRGLGAPLTEDQQNRLSEEIEKKWQELEKLP LRENKRVP L TALLNQSRGERRGP  
PSDGHEALEKEVQALRAQLEAWRLQGEAPQSALRSQEDGHI PPGYISQEACERSLAEMESSHQQVMEELQRHHER  
ELQRLQQEKEWLLAEETAATASAIEAMKKAYQEELSRELSKTRSLQQGPDGLRKQHQS DVEALKRELQVLSEQYS  
QKCLEIGALMRQAEEREHTLRRCQQEGQELLRHNQELHGRLSEEIDQLRGFIASQGMGNGCGRSNERSSCELEVL  
LRVKENELQYLKKEVQCLRDELQMMQKDKRFTSGKYQDVYVELSHIKTRSEREIEQLKEHLRLAMAALQEKESMR  
NSLAE\*

**(16) pdcDNA-Flag-TRIOBP-1  $\Delta$ 1-59 $\Delta$ 333-340**

MDYKDDDDKAAITSLYKKAGFKGTNSVDMTPDLLNFKKGWMSILDEPGEPPSPSLTTTSTSQWKKHWFVLTDS SL  
KYRDS TAE EADELDGEIDLRSDTDVTEYAVQRNYGFQIHTKDAVYTLSAMTSGIRRNWIEALRKTVRPTSAPDV  
TKLSDSNKENALHSYSTQKGPLKAGEQRAGSEVISRGGPRKADGQRQALDYVELSPLTQAS PQARTPARTPDR L  
AKQEELERDLAQRSEERRKNWFEATDSRTPEVPAGEGPRRGLGAPLTEDQQNRLSEEIEKKWQELEKLP LRENKRVP  
PGTRGERRGPPSDGHEALEKEVQALRAQLEAWRLQGEAPQSALRSQEDGHI PPGYISQEACERSLAEMESSHQQV  
MEELQRHHERELQRLQQEKEWLLAEETAATASAIEAMKKAYQEELSRELSKTRSLQQGPDGLRKQHQS DVEALKR  
ELQVLSEQYSQKCLEIGALMRQAEEREHTLRRCQQEGQELLRHNQELHGRLSEEIDQLRGFIASQGMGNGCGRSN  
ERSSCELEVLLRVKENELQYLKKEVQCLRDELQMMQKDKRFTSGKYQDVYVELSHIKTRSEREIEQLKEHLRLAM  
AALQEKESMRNSLAE\*

**(17) pdcDNA-Flag-TRIOBP-1 1-280**

MDYKDDDDKAAITSLYKKAGFAATMGGWKGPQGRRGKEGPEARRRAAERGGGGGGGGVPAPRSPAREPRPR  
SCLLLPPPWGAAMTPDLLNFKKGWMSILDEPGEPPSPSLTTTSTSQWKKHWFVLTDS SLKYRDS TAE EAD  
ELDGEIDLRSDTDVTEYAVQRNYGFQIHTKDAVYTLSAMTSGIRRNWIEALRKTVRPTSAPDVTKLSDSNK  
ENALHSYSTQKGPLKAGEQRAGSEVISRGGPRKADGQRQALDYVELSPLTQAS PQARTPARTPDR LAKQE  
ELERDLAQRSEERRKNWFEAT\*

**(18) pdcDNA-Flag-TRIOBP-1 281-555**

MDYKDDDDKAAITSLYKKAGFAATMDSRTPEVPAGEGPRRGLGAPLTEDQQNRLSEEIEKKWQELEKLPLRENKR  
VPLTALLNQSRGERRGPPSDGHEALEKEVQALRAQLEAWRLQGEAPQSALRSQEDGHIIPPGYISQEACERSLAEM  
ESSHQVMEELQRHHERELQRLQOEKEWLLAEETAATASAI EAMKKAYQEELSRELSKTRSLQQGPDGLRKQHQS  
DVEALKRELQVLSEQYSQKCLEIGALMRQAEEREHTLRRCQQEGQELLRHNQELHGRLSEEIDQLRGFIASQGMG  
★

**(19) pdcDNA-Flag-TRIOBP-1 556-652**

MDYKDDDDKAAITSLYKKAGFAATMNGCGRSNERSSCELEVLRLVKENELQYLKKEVQCLRDELQMMQKD  
KRFTSGKYQDVYVELSHIKTRSEREIEQLKEHLRLAMAALQEKESMRNSLAE★

**(20) pDEST-CMV-N-EGFP (empty control)**

MVSKGEELFTGVVPILVELDGDVNGHKFSVSGEGEGDATYGKLTCLKFICTTGKLPVPWPTLVTTLTLYGVQCFSRY  
PDHMKQHDFFKSAMPEGYVQERTIFFKDDGNYKTRAEVKFEGDTLVNRIELKGIDFKEDGNILGHKLEYNNSHN  
VYIMADKQKNGIKVNFKIRHNIEDGSVQLADHYQONTPIGDGPVLLPDNHYLSTQSALS KDPNEKRDHMLLEFV  
TAAGITHGMDELYKAVPDRKQVCTKKQALKEPIQSTGSGTEFAAALEISRPSFLVQSGDN★

**(21) pDEST-CMV-N-EGFP-CRMP1 Sv**

MVSKGEELFTGVVPILVELDGDVNGHKFSVSGEGEGDATYGKLTCLKFICTTGKLPVPWPTLVTTLTLYGVQCFSRY  
PDHMKQHDFFKSAMPEGYVQERTIFFKDDGNYKTRAEVKFEGDTLVNRIELKGIDFKEDGNILGHKLEYNNSHN  
VYIMADKQKNGIKVNFKIRHNIEDGSVQLADHYQONTPIGDGPVLLPDNHYLSTQSALS KDPNEKRDHMLLEFV  
TAAGITHGMDELYKAVPDRDQTSLYKKAGFKGTNSVDGMSYQGKKSIPHITSDRLLIKGGRIINDDQSLYADVYL  
EDGLIKQIGENLIVPGGVKTIEANGRMVIPGGIDVNTYLQKPSQGMATAADDFQGTRAALVGGTTMIIDHVVP  
GSSLLTSFEKWHEAADTKSCCDYSLHVDITSWYDGVREELEVLVQDKGVNSFQVYMAKDVYQMSDSQLYEAFTF  
LKGLGAVILVHAENGDLIAQEQKRILEMGITGPEGHALSRPEELEAEAVFRAITIAGRINCPVYITKVMKSAAAD  
IALARKKGPLVFGEPIAASLGTDGTHYWSKNWAKAAAFVTSPLSPDPTTPDYLTSLACGDLQVTGSGHCPYS  
TAQKAVGKDNFTLIEPGVNGIEERMTVVWDKAVATGKMDENQFVAVTSTNAAKIFNLYPRKGRIAVGSDADVVIW  
DPDKLKTITAKSHKSAVEYNIFEGMECHGSPLVVISQKIVFEDGNINVNKGMGRFIPRKAFFEHLVYQVVKIRNK  
VFGLQGVSRGMYDGPVYEVDPATPKYATPAPSAKSSPSKHQPPPIRNLHQSNFSLSGAQIDDNNPRRTGHRIVAPP  
GGRSNITSLG★

**(22) pDEST-CMV-N-EGFP-CRMP1 Lv**

MVSKGEELFTGVVPILVELDGDVNGHKFSVSGEGEGDATYGKLTCLKFICTTGKLPVPWPTLVTTLTLYGVQCFSRY  
PDHMKQHDFFKSAMPEGYVQERTIFFKDDGNYKTRAEVKFEGDTLVNRIELKGIDFKEDGNILGHKLEYNNSHN  
VYIMADKQKNGIKVNFKIRHNIEDGSVQLADHYQONTPIGDGPVLLPDNHYLSTQSALS KDPNEKRDHMLLEFV  
TAAGITHGMDELYKAVPDRDQTSLYKKAGFKGTNSVDGMADRRRAWNTEDDLPVYLARPGSAAQTPRQKYGGMFA  
AVEGAYENKTIDFDAYSVGRRSARTPRSAGRPDAVGLPGPGGSEDTASDVSEPSGSAVSSPGERDERPPTLRIR  
RPAPRDLPLGRDNGQSDRLLIKGGRIINDDQSLYADVYLEDGLIKQIGENLIVPGGVKTIEANGRMVIPGGIDVN  
TYLQKPSQGMATAADDFQGTRAALVGGTTMIIDHVVPPEPGSSLLTSFEKWHEAADTKSCCDYSLHVDITSWYDGV  
REELEVLVQDKGVNSFQVYMAKDVYQMSDSQLYEAFTFLKGLGAVILVHAENGDLIAQEQKRILEMGITGPEGH  
ALSRPEELEAEAVFRAITIAGRINCPVYITKVMKSAAADIALARKKGPLVFGEPIAASLGTDGTHYWSKNWAKA  
AAFVTSPLSPDPTTPDYLTSLACGDLQVTGSGHCPYSTAQKAVGKDNFTLIEPGVNGIEERMTVVWDKAVATG  
KMDENQFVAVTSTNAAKIFNLYPRKGRIAVGSDADVVIWDPDKLKTITAKSHKSAVEYNIFEGMECHGSPLVVIS  
QKIVFEDGNINVNKGMGRFIPRKAFFEHLVYQVVKIRNKVFGLQGVSRGMYDGPVYEVDPATPKYATPAPSAKSSP  
SKHQPPPIRNLHQSNFSLSGAQIDDNNPRRTGHRIVAPPGGRSNITSLG★

### (23) pDEST-CMV-N-EGFP-DISC1

MVSKGEELFTGVVPILVELDGDVNGHKFSVSGEGEGDATYGKLTCLKFICTTGKLPVPWPTLVTTLTLYGVQCFSRY  
PDHMKQHDFFKSAMPEGYVQERTIFFKDDGNYKTRAEVKFEGDTLVNRIELKGIDFKEDGNILGHKLEYNNSHN  
VYIMADKQKNGIKVNFKIRHNIEDGSVQLADHYQNTPIGDGPVLLPDNHYLSTQSALS KDPNEKRDHMLLEFV  
TAAGITHGMDELYKAVPDRDQTSLYKKVGTMPGGGPQGAPAAAGGGGVSHRAGSRDCLPPAACFRRRRLARRPGY  
MRSSTGPGIGFLSPAVGTLFRFPGGVSGEESHSESRARQCGLDSRGLLVRSVPVSKSAAAPT VTSVRGTS AHFGI  
QLRGGTRL PDRLSWPCGPGSAGWQQEFAAMDSSETLDASWEAACSDGARRVRAAGSLPSAELSSNSCSPGCGPEV  
PPTPPGSHSAFTSSFSFIRLSLGSAGERGEAEGCPPSREAESHCSQPQEMGAKAASLDGPHEDPRCLS QPFSLLA  
TRVSADLAQAARNSSRPERDMHSLPDMDPGSSSSLDPSLAGCGGDGSSSGDAHSWDTLLRKWEPVLRDCLLRNR  
RQMEVISLRKLKQLQEDAVENDDYDKAETLQQRLEDLEQEKISLHFQLPSRQPALSSFLGHLAAQVQAALRRGA  
TQQASGDDTHTPLRMEPRLLEPTAQDSLHVSITRRDWLLQEKQQLQKEIEALQARMFVLEAKDQQLRREIEEQEQ  
QLQWQCGDLTPLVGQLSLGQLQEVSKALQDTLASAGQIPFHAEP PETIRSLQERIKSLNLSLKEITTKVCMSEKF  
CSTLRKKVNDIETQLPALLEAKMHAISGNHFWTAKDLTEEIRSLT SEREGLEGLLSKLLVLSSRN VKKLGSVKED  
YNRLRREVEHQETAYETSVKENTMKYMETLKNKLCSCCKPLL GKVWEADLEACRLLIQSLQLQEQEARGSLSVEDER  
QMDDLEGAAPP IPPRLHSEDKRKTP LKESYILSAELGEKCEDIGKKLLYLEDQLHTAIHSHDEDLIQSLRRELQM  
VKETLQAMILQLQPAKEAGEREAAA SCMTAGVHEAQADPAFLYKVVIIIN\*

### (24) pDEST-CMV-N-EGFP-NPAS3

MVSKGEELFTGVVPILVELDGDVNGHKFSVSGEGEGDATYGKLTCLKFICTTGKLPVPWPTLVTTLTLYGVQCFSRY  
PDHMKQHDFFKSAMPEGYVQERTIFFKDDGNYKTRAEVKFEGDTLVNRIELKGIDFKEDGNILGHKLEYNNSHN  
VYIMADKQKNGIKVNFKIRHNIEDGSVQLADHYQNTPIGDGPVLLPDNHYLSTQSALS KDPNEKRDHMLLEFV  
TAAGITHGMDELYKAVPDRDQTSLYKKVGTAVPDRIKQVCTKKQKGRQGPPMAPTKPSFQQDPSRRERLQALRKE  
KSRDAARSRRGKENFEFYELAKLLPLPAAITSQLDKASIIRLTISYLMRDFANQGDPPWNLRMGPPPPNTSVKG  
IQMWKSEL CMRKTPCEVIGAQRRRSPSALAIEVFEAHLGSHILQSLDGFVFALNQEGKFLYISETVSIYLGLSQV  
ELTGSSVFDYVHPGDHVEMAEQ LGMKLP PGRGLLSQGTAE DGASSASSSSQSETPEPVESTSPSLLTDTN T LERS  
FFIRMKSTLT KRGVHIKSSGYKVIHITGRLRLRVSLSHGRTVPSQIMGLVVVAHALPPPTINEVRIDCHMFVTRV  
NMDLNIIYCENRISDYMDLTPVDIVGKRCYHFIHAEDVEGIRHSHLDLLNKGCQVTKYYRWMQKNGGYIWIQSSA  
TIAINAKNANEKNI IWNVYLLSNPEYKDT PMDIAQLPHLPEKTSESSETSDSES DSKDTSGITEDNENSKSDEKG  
NQSENSEDPEPDRKKSGNACDNMNCNDDGHSSSNPDSRSDSDSFEHSDFENPKAGEDGFGALGAMQIKVERYVE  
SESDLRLQNCESLTSDSAKSDSAGEAGAQAASSKHQKRKKRRKRQKGSASRRRLSSASSPGGLDAGLVEPPRLL  
SSPNASAVLKI KTEISEPINFDNDSSIWNYPNREISRNESPYSMTKPPSSEHFPS PQGGGGGGGGGGGLHVAIP  
DSVLT PPGADGAAARKTQFGASATAALAPVASDPLSPPLSASPRDKHPNGGGGGGGGGGGAGGGGPSASNSLLYT  
GDLEALQRLQAGNVVLPLVHRVTGT LAATSTAAQRVYTTGTIRYAPAEVTLAMQSNLLPNAHAVNFVDVNSPGFG  
LDPKTPMEMLYHHVHRLNMSGPFGGAVSAASLTQMPAGNVFTTAEGLFSTLPFPVYSNGIHAAQT LERKEDDPAF  
LYKVVIIIN\*

### (25) pDEST-CMV-N-EGFP-TRIOBP-1

MVSKGEELFTGVVPILVELDGDVNGHKFSVSGEGEGDATYGKLTCLKFICTTGKLPVPWPTLVTTLTLYGVQCFSRY  
PDHMKQHDFFKSAMPEGYVQERTIFFKDDGNYKTRAEVKFEGDTLVNRIELKGIDFKEDGNILGHKLEYNNSHN  
VYIMADKQKNGIKVNFKIRHNIEDGSVQLADHYQNTPIGDGPVLLPDNHYLSTQSALS KDPNEKRDHMLLEFV  
TAAGITHGMDELYKAVPDRDQTSLYKKAGFKGTNSVDMGGWKGPQRRGKEGPEARRRAAERGGGGGGGGVPAPR  
SPAREPRPRSCLLLPPPWGAAMTPDLLNFKKGWMSILDEPGEPPSPSLTTTSTSQWKHWFVLTDSSSLKYRDST  
AEEADELDGEIDLRSDTVTEYAVQRNYGFIHTKDAVYTL SAMTSGIRRNWIEALRKTVRPTSAPDVTKLSDSN  
KENALHSYSTQKGPLKAGEQRAGSEVISRGGRKADGQRQALDYVELSPLTQASPQRARTPARTPDRLAKQEELE  
RDLAQRSEERRKWFEATDSRTPEVPAGEGPRRGLGAPLTEDQQNRLSEEIEKKWQELEKLPLRENKRVP LTALLN  
QSRGERRGPPSDGHEALEKEVQALRAQLEAWRLQGEAPQSALRSQEDGHI PPGYISQEACERSLAEMESSHQVM  
EELQRHHERELQRLQKEKEWLLAEETAATASAI EAMKKAYQEELSRELSKTRSLQQGPDGLRKQHQS DVEALKRE  
LQVLSEQYSQKCLEIGALMRQAEEREHTLRRCQQEQELLRHNLHGR LSEEIDQLRGFIASQGMGNGCGRSNE  
RSSCELEVLLRVKENELQYLKKEVQCLRDELQMMQKDKRFTSGKYQDVYVELSHIKTRSEREIEQLKEHLRLAMA  
ALQEKE SMRNSLAE\*
